# Supplementary material for: A voltammetric method for Fe(iii) in blood serum using a screen-printed electrode modified with a Schiff base ionophore
Source: Royal Society of Chemistry journal article supplement (doi:10.1039/c8an00174j), 2018-01-01

## **Voltammetric Method for Fe (III) in Blood Serum using Screen Printed Electrode modified with a Schiff Base ionophore**

Susheel K Mittal<sup>a\*</sup>, Sonia Rana<sup>a</sup>, Navneet Kaur<sup>b</sup> and Craig E Banks<sup>c</sup>

<sup>a</sup>School of Chemistry and Biochemistry, Thapar Institute of Engineering and Technology, Patiala 147004, India

<sup>b</sup>Centre of Nanoscience & Nanotechnology, Panjab University, Chandigarh, Punjab 160014, India

<sup>c</sup>School of Chemistry and the Environment, Manchester Metropolitan University, Manchester M1 5GD, UK

Email: smittal@thapar.edu

**Figure S1.** Anodic differential pulse voltammogram obtained in 0.1 M of different electrolytes using measurement parameters: step size 10 mV, sample period 0.5 s, pulse time 0.1 s and pulse size 50 mV. Ag/AgCl was used as a reference electrode. Spline fitting has been used to draw graph.

**Figure S2.** Cyclic voltammograms showing anodic and cathodic peaks recorded in HCl (0.1 M) electrolyte on SMS-2 modified SPE at different scan rates: 20, 40, 50, 60, 70, 80, 90, 100, 110, 120, 130, 140, 150 mVs<sup>-1</sup>. (Ag/AgCl as a reference electrode and HCl (0.1 M) as electrolyte) and graph was drawn using Spline fitting.

**Figure S3.** Differential pulse voltammetry of SMS-2 modified SPE showing analytical signals obtained during anodic scan in the presence of different metal ions (10 µL of 1×10<sup>-2</sup> M), recorded using HCl (0.1 M) as supporting electrolyte and DPV parameters: step size 10 mV, sample period 0.5 s, pulse time 0.1 s and pulse size 50 mV. Ag/AgCl was used as a reference electrode and Spline fitting has been used to draw graph.

**Figure S4.** Anodic differential pulse voltammogram recorded on SMS-2 modified SPE for different concentrations of ferric ions (0.0 to 8.33 µM) obtained using HCl (0.1 M) supporting electrolyte. Ag/AgCl used as a reference electrode and DPV parameters: step size 10 mV, sample period 0.5 s, pulse time 0.1 s and pulse size 50 mV. Graph was drawn using Spline fitting.

Figure S1

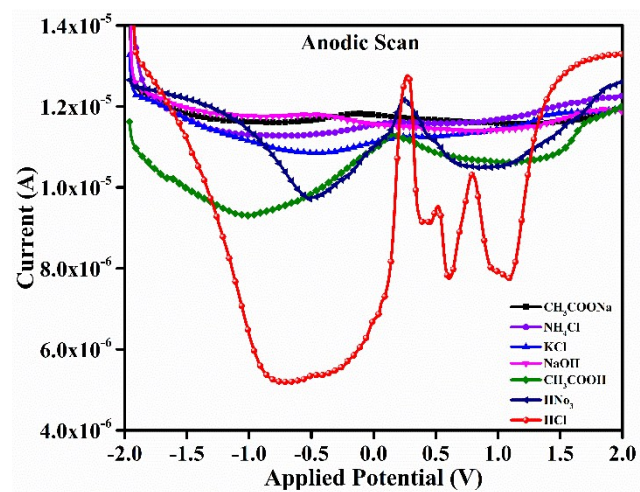

Figure S2

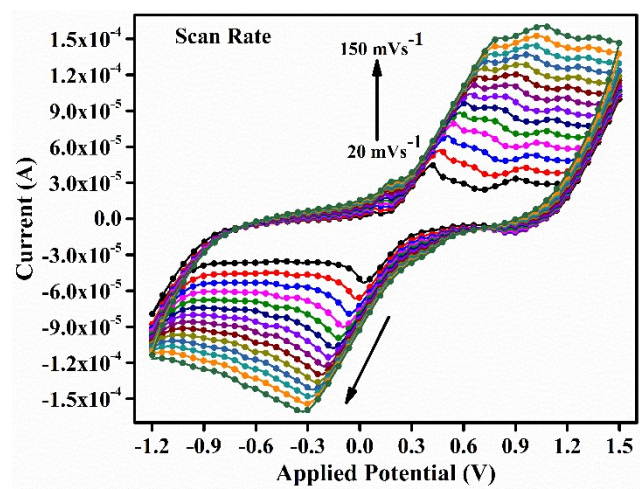

Figure S3

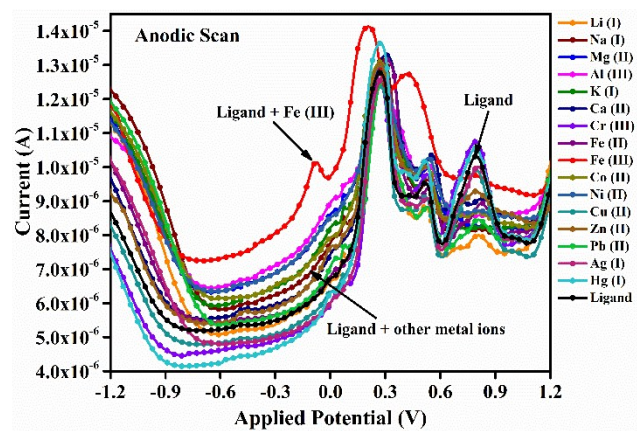

Figure S4

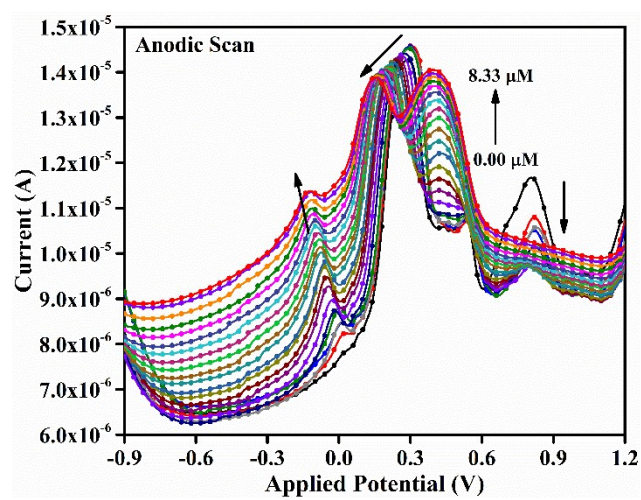

Supplement: c8an00174j1.pdf [file c8an00174j1.pdf]
